# Supplementary material for: Mutation mapping and identification by whole-genome sequencing
Source: HighWire-hosted journal article supplement (doi:10.1101/gr.135541.111), 2012-05-03
Supplement: SNPmap_SUPL_figures.GenRes_rev2.vfin_fixed.pdf [file SNPmap_SUPL_figures.GenRes_rev2.vfin_fixed.pdf]

# Supplementary Table ST1

**NGS datasets and mapping interval correlation**

| Sample name | Individuals in the pool | Read type | Obtained number of reads | Average genomic coverage | Approximate mapped interval |
|-------------|-------------------------|-----------|--------------------------|--------------------------|-----------------------------|
| clo s5 wt   | 20                      | 100bp se  | 94,846,364               | 6.8x                     | 800kb*                      |
| clo s5 mt   | 20                      | 100bp se  | 99,737,453               | 7.1x                     | 800kb*                      |
| clo m39 wt  | 160                     | 100bp se  | 104,967,597              | 7.5x                     | 800kb*                      |
| clo m39 mt  | 160                     | 100bp se  | 102,756,452              | 7.3x                     | 800kb*                      |
| ca1 wt      | 20                      | 75bp pe   | 89,609,570               | 9.6x                     | 7Mb                         |
| ca1 mt      | 20                      | 75bp pe   | 94,626,189               | 10.1x                    | 7Mb                         |
| mlb wt      | 5                       | 75bp pe   | 73,585,494               | 7.9x                     | 20Mb                        |
| mlb mt      | 20                      | 75bp pe   | 82,549,416               | 8.8x                     | 20Mb                        |
| Line 27SH   | 9                       | 75bp pe   | 131,573,054              | 7.6x                     | 5.5Mb                       |

**\*likely missing contigs in the genome assembly**

## Supplementary Table ST1

Summary of all Next Generation Sequencing runs on HiSeq2000 used in the work, displaying: the number of individuals per pool used for mapping, read length and type used, number of reads returned from the sequencer, average genomic coverage and corresponding mapping interval.

## Supplementary Figure S1

Read number and coverage effect on WG score in real downsampled 75bp  
paired-end NGS data (ca1 sample)

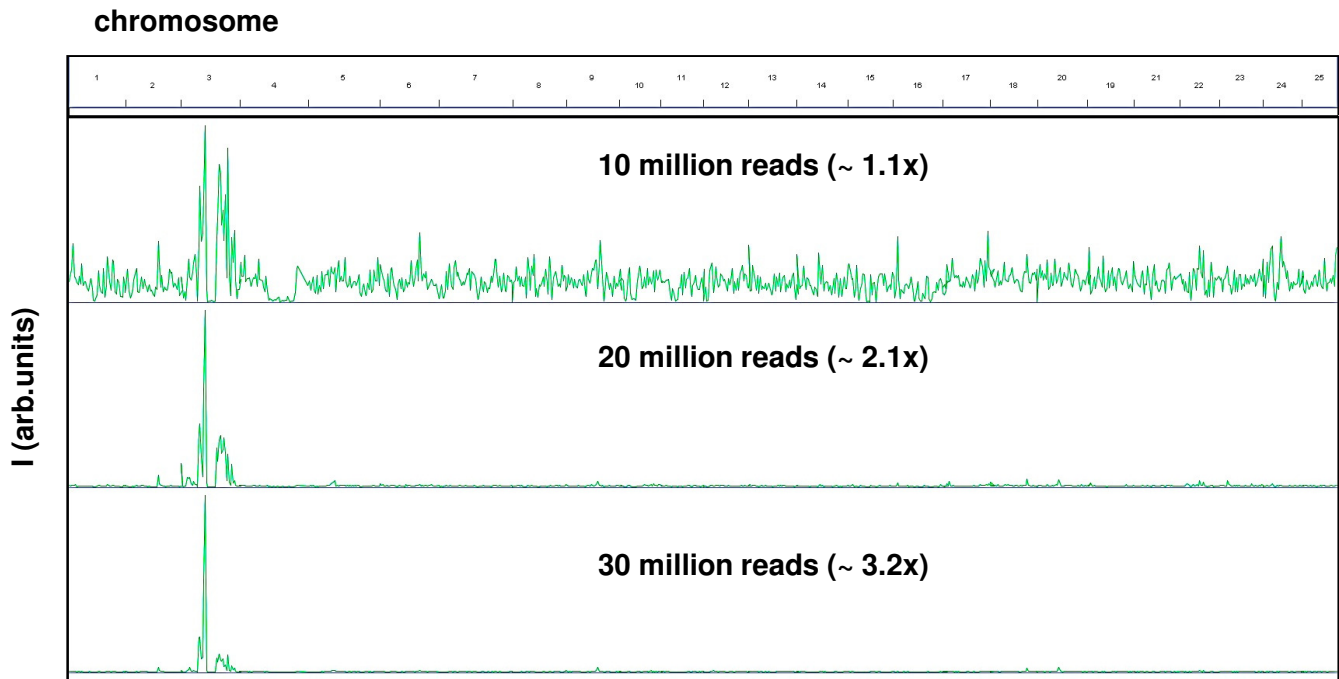

### Supplementary Figure S1

Model experiment to analyze the required minimum coverage to roughly map the mutation region. The initial ~90 million reads received for both pools of ca1 were downsampled to 10, 20 and 30 million reads accordingly. The homozygosity score still picks up the correct region amid having increased noise level on the whole genome plot.

## Supplementary Figure S2

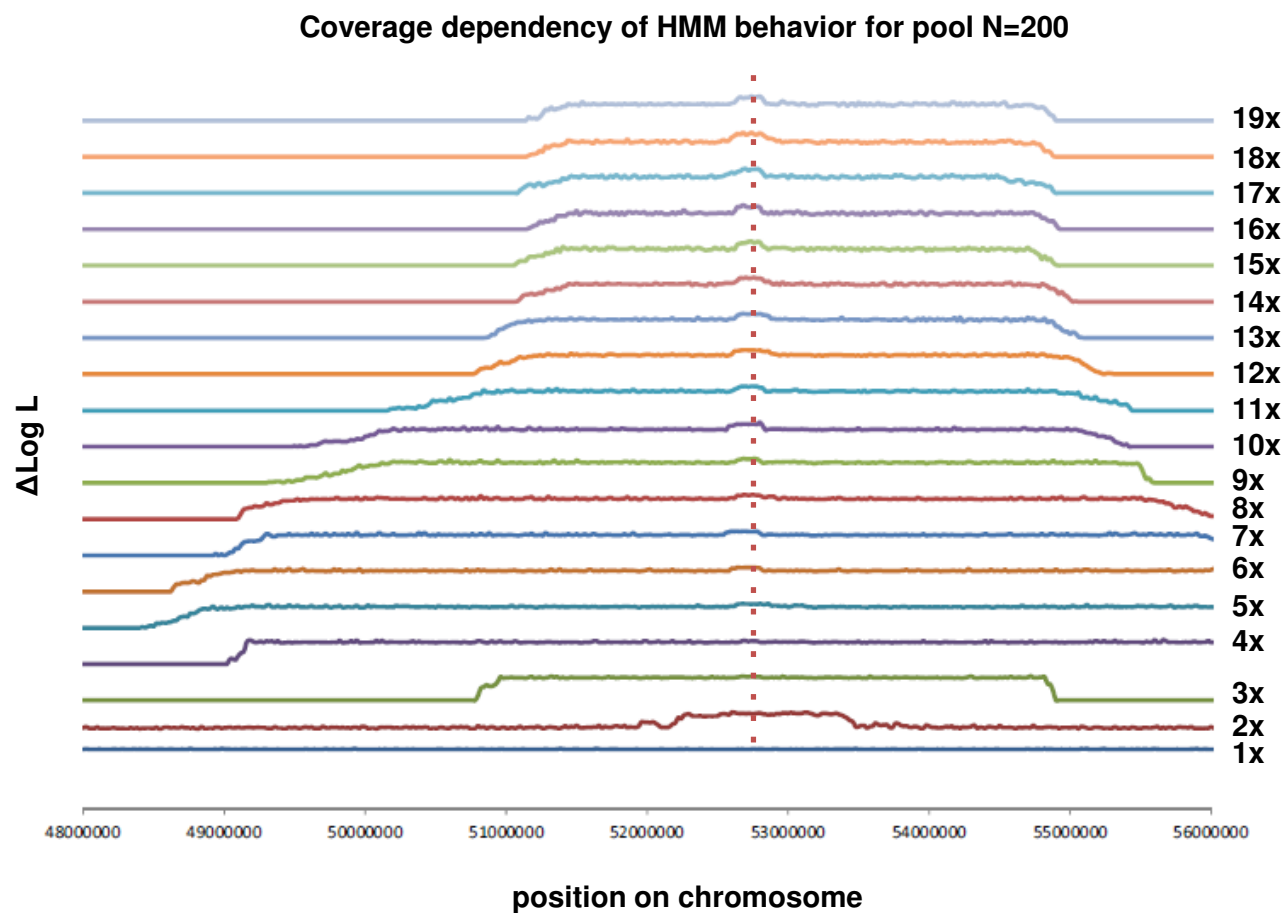

| Coverage | Mapped area start | Mapped area end | Mapped Interval |
|----------|-------------------|-----------------|-----------------|
| 1x       | -                 | -               | -               |
| 2x       | 52600000          | 53120000        | 520kb           |
| 5x       | 52680000          | 52860000        | 180kb           |
| 7x       | 52600000          | 52700000        | 100kb           |
| 11x      | 52680000          | 52760000        | 80kb            |
| 18x      | 52680000          | 52740000        | 60kb            |

## Supplementary Figure S2

Simulation experiment to analyze the effect of sequencing depth and pool size on the HMM accuracy and behavior. Results for a pool of DNA from 200 individuals.

## Supplementary Figure S3

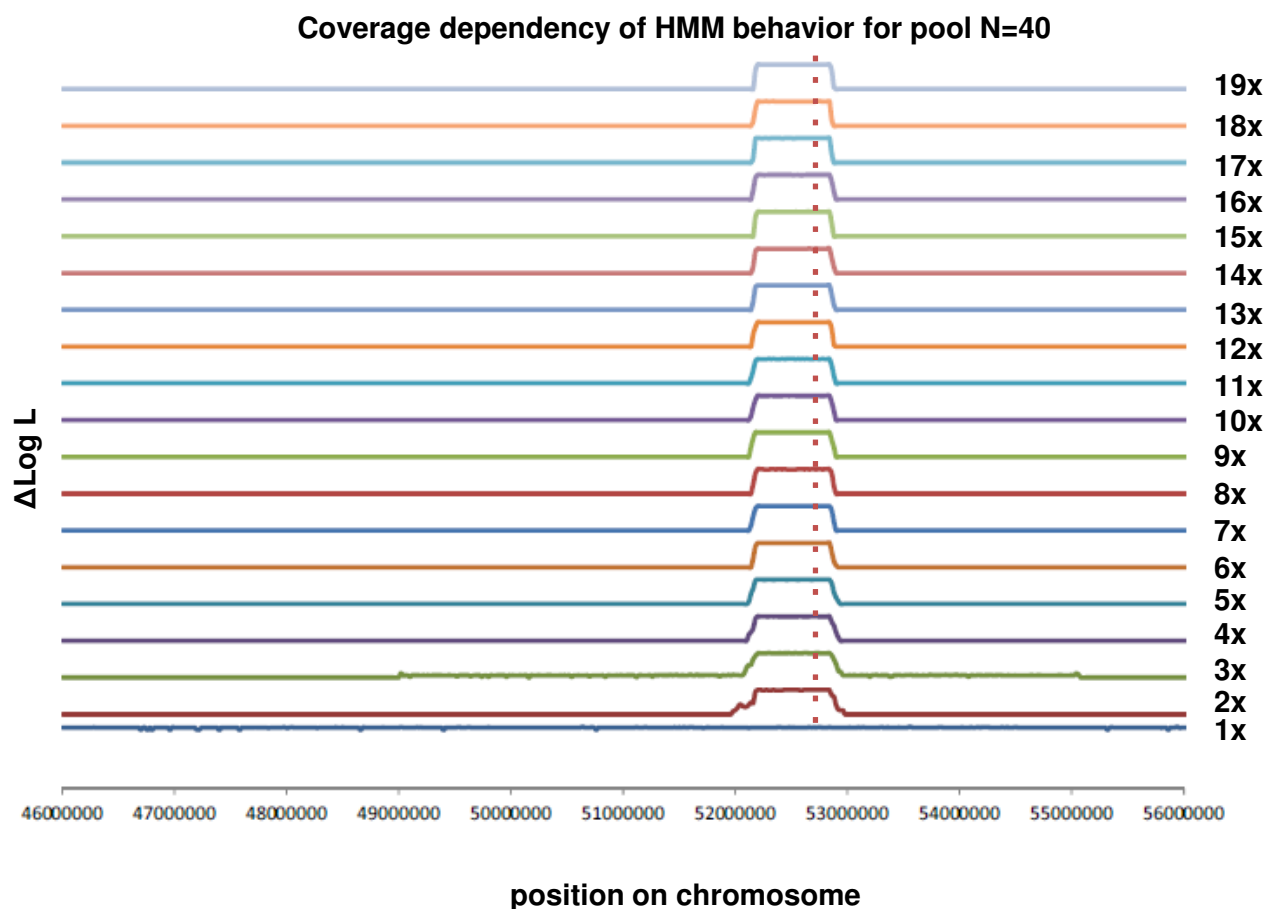

| Coverage | Mapped area start | Mapped area end | Mapped Interval |
|----------|-------------------|-----------------|-----------------|
| 1x       | 50640000          | 53560000        | -               |
| 2x       | 52200000          | 52840000        | 640kb           |
| 3x       | 52280000          | 52840000        | 560kb           |
| 7x       | 52200000          | 52800000        | 600kb           |
| 11x      | 52300000          | 52780000        | 480kb           |
| 15x      | 52360000          | 52740000        | 380kb           |

## Supplementary Figure S3

Simulation experiment to analyze the effect of sequencing depth and pool size on the HMM accuracy and behavior. Results for a pool of DNA from 40 individuals.

## Supplementary Figure S4

Coverage dependency of HMM behavior for pool N=20

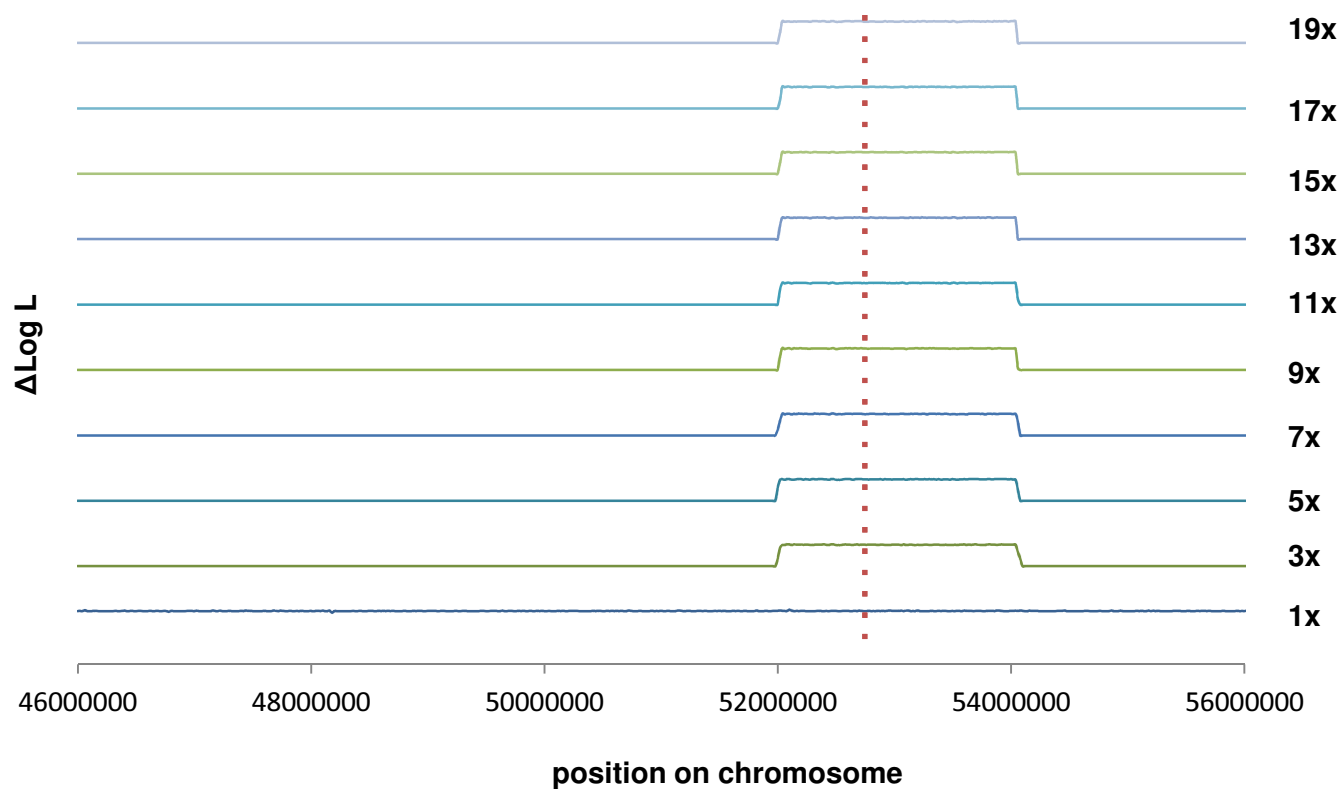

| Coverage | Mapped area start | Mapped area end | Mapped Interval |
|----------|-------------------|-----------------|-----------------|
| 1x       | -                 | -               | -               |
| 3x       | 52080000          | 53920000        | 1840kb          |
| 9x       | 52040000          | 53900000        | 1860kb          |
| 13x      | 52080000          | 53880000        | 1800kb          |

## Supplementary Figure S4

Simulation experiment to analyze the effect of sequencing depth and pool size on the HMM accuracy and behavior. Results for a pool of DNA from 20 individuals.

## Supplementary Figure S5

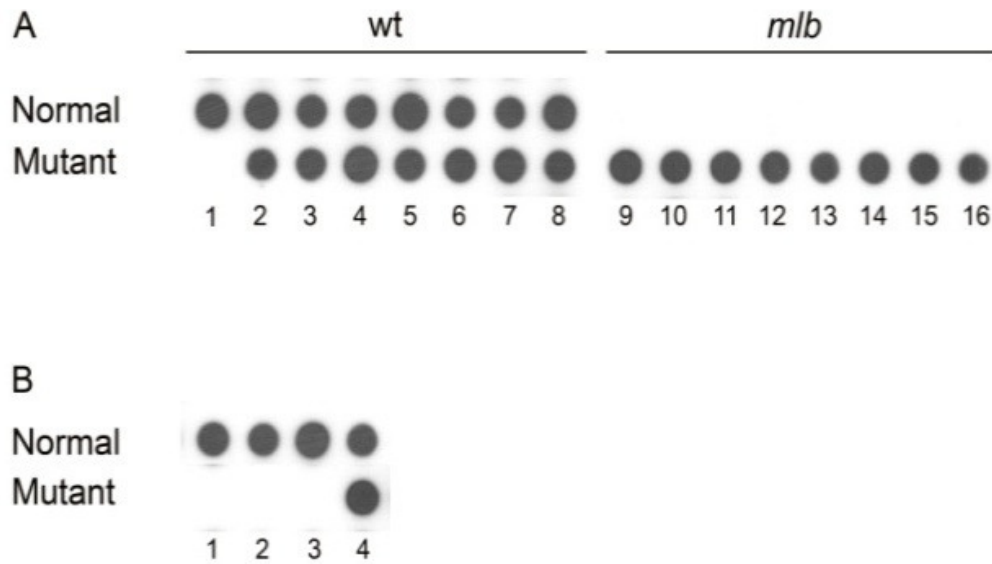

### Supplementary Figure S5

Allele-specific oligonucleotide (ASO) hybridization assay was employed to show complete co-segregation between the mutant phenotype and genotype from sorted progenies of a *mlb* heterozygous mating. A - Wild type siblings were either  $+/+$  or  $+/-$  (lanes 1-8), while phenotypic *mlb* embryos were all homozygous for mutant non-sense allele (lanes 9-16). B - DNA from a mis-identified *mlb* heterozygote individual (lane 4) revealed the presence of a mutant allele by ASO hybridization.

## Supplementary Figure S6

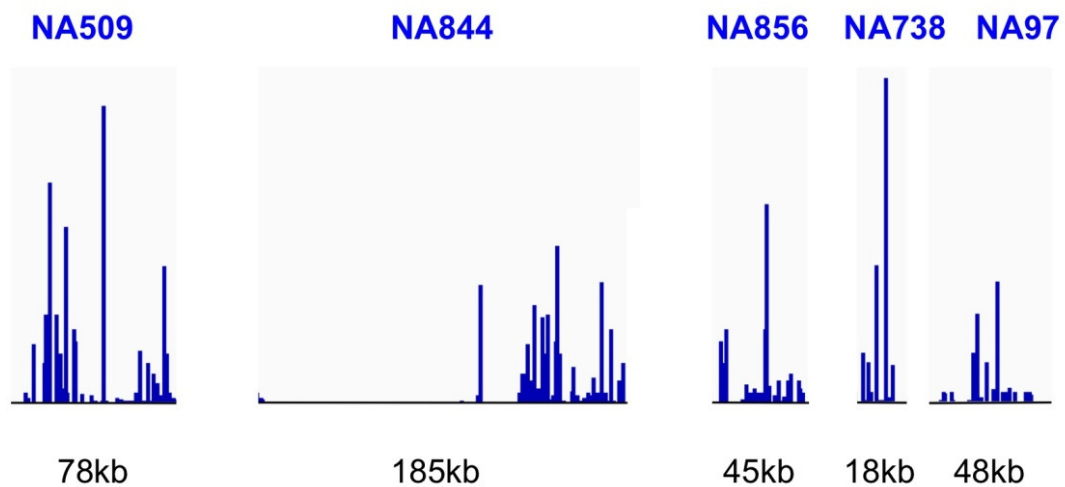

### Supplementary Figure S6

Example of utilizing NGS-based SNP analysis to place previously unassociated scaffolds into the genome assembly. Sequence from *cloche*<sup>s5</sup> mutants aligned to Zv9scaffolds NA509, NA844, NA856, NA738 and NA 97 all demonstrated high homozygosity scores indicating likely association with the mutation region.

## Supplementary Figure S7

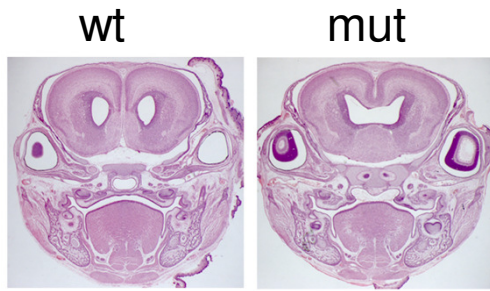

### Supplementary Figure S7

Histological feature of the Line 27H mutant (mut) compared to wild-type (wt) mice.
